# Supplementary material for: Octopamine increases the excitability of neurons in the snail feeding system by modulation of inward sodium current but not outward potassium currents
Source: PubMed Central journal article supplement (PMC1351263; doi:10.1186/1471-2202-6-70), 2005-12-06

Constants

Equilibrium voltages, mV

Sodium, Potassium, Leak

28

$$vNa := 35$$

$$vK := -67$$

$$vLeak := -20$$

Fixed leak conductance

$$gLeak := 0.020$$

Sodium current

maximum conductance, m and h components

with max value and time constant as functions of voltage

$$gbarNa := 7.000$$

$$minf := v \rightarrow \frac{1}{1 + e^{(-3 - 1/8 v)}}$$

$$taum := v \rightarrow 0.000 + \frac{1}{125} \frac{1}{1 + e^{(0.500 v + 20.000)}}$$

$$hinf := v \rightarrow \frac{1}{1 + e^{(7.632 + 0.263 v)}}$$

$$tauh := v \rightarrow 0.002 + \frac{3}{200} \frac{1}{1 + e^{(0.263 v + 6.395)}}$$

Sustained Potassium current

maximum conductance, NA and NB components

with max value and time constant as functions of voltage

$$gbarKA := 1.440$$

$$NAinf := v \rightarrow \frac{1}{1 + e^{(0.898 - 0.060 v)}}$$

$$tauNA := v \rightarrow 0.038 - 0.000 v$$

$$gbarKB := 2.880$$

$$NBinf := v \rightarrow \frac{1}{1 + e^{(0.589 - 0.068 v)}}$$

$$tauNB := v \rightarrow 0.006 - 0.000 v$$

Transient Potassium current

maximum conductance, a and b components

with max value and time constant as functions of voltage

$$gbarA := 12$$

$$ainf := v \rightarrow \frac{1}{1 + e^{(-0.879 - 0.071 v)}}$$

$$taua := v \rightarrow 0.002 - 0.000 v$$

$$binf := v \rightarrow \frac{1}{1 + e^{(0.152 v + 10.758)}}$$

$$taub := v \rightarrow 0.026 + 0.000 v$$

Initial conditions, start from equilibrium voltage (-52.5 mV)  
 $v0 := -52.500$

Sodium current

$$m0 := 0.028$$

$$h0 := 0.998$$

Sustained Potassium current

$$NA0 := 0.017$$

$$NB0 := 0.015$$

Transient Potassium current

$$a0 := 0.055$$

$$b0 := 0.057$$

Current equations

Sodium current

Sustained Potassium current

Transient Potassium current

Leak current

Total ionic current

$$INa := 7.000 (v(t) - 35) m(t)^3 h(t)$$

$$IK := (v(t) + 67) (1.440 NA(t)^2 + 2.880 NB(t))$$

$$IA := 12 (v(t) + 67) a(t)^4 b(t)$$

$$ILeak := 0.020 v(t) + 0.400$$

$$ITotal := 7.000 (v(t) - 35) m(t)^3 h(t) + (v(t) + 67) (1.440 NA(t)^2 + 2.880 NB(t)) + 12 (v(t) + 67) a(t)^4 b(t) + 0.020 v(t) + 0.400$$

Equilibrium current as function of voltage

Sodium current

Sustained Potassium current

Transient Potassium current

Leak current

$$\frac{7.000 (v(t) - 35) h(t)}{\left(1 + e^{\left(-3 - \frac{t}{8}\right)}\right)^3}$$

$$\begin{aligned}
& \frac{7.000 (v(t) - 35)}{\left(1 + e^{\left(-3 - \frac{t}{8}\right)}\right)^3 (1 + e^{(7.632 + 0.263 t)})} \\
IN_{ainf} := & \frac{7.000 (t - 35)}{\left(1 + e^{\left(-3 - \frac{t}{8}\right)}\right)^3 (1 + e^{(7.632 + 0.263 t)})} \\
& (v(t) + 67) \left( \frac{1.440}{(1 + e^{(0.898 - 0.060 t)})^2} + 2.880 \text{NB}(t) \right) \\
(v(t) + 67) & \left( \frac{1.440}{(1 + e^{(0.898 - 0.060 t)})^2} + \frac{2.880}{1 + e^{(0.589 - 0.068 t)}} \right) \\
IK_{inf} := & (t + 67) \left( \frac{1.440}{(1 + e^{(0.898 - 0.060 t)})^2} + \frac{2.880}{1 + e^{(0.589 - 0.068 t)}} \right) \\
& \frac{12 (v(t) + 67) b(t)}{(1 + e^{(-0.879 - 0.071 t)})^4} \\
& \frac{12 (v(t) + 67)}{(1 + e^{(-0.879 - 0.071 t)})^4 (1 + e^{(0.152 t + 10.758)})} \\
IA_{inf} := & \frac{12 (t + 67)}{(1 + e^{(-0.879 - 0.071 t)})^4 (1 + e^{(0.152 t + 10.758)})} \\
& ILeak_{inf} := 0.020 t + 0.400
\end{aligned}$$

Total Equilibrium current

$$\begin{aligned}
IT_{otalinf} := & \frac{7.000 (t - 35)}{\left(1 + e^{\left(-3 - \frac{t}{8}\right)}\right)^3 (1 + e^{(7.632 + 0.263 t)})} \\
& + (t + 67) \left( \frac{1.440}{(1 + e^{(0.898 - 0.060 t)})^2} + \frac{2.880}{1 + e^{(0.589 - 0.068 t)}} \right) \\
& + \frac{12 (t + 67)}{(1 + e^{(-0.879 - 0.071 t)})^4 (1 + e^{(0.152 t + 10.758)})} + 0.020 t + 0.400
\end{aligned}$$

Plotting Time constants and equilibrium values

Sodium current

Sustained Potassium current

Transient Potassium current

Total Equilibrium current

Time constants for Sodium Current

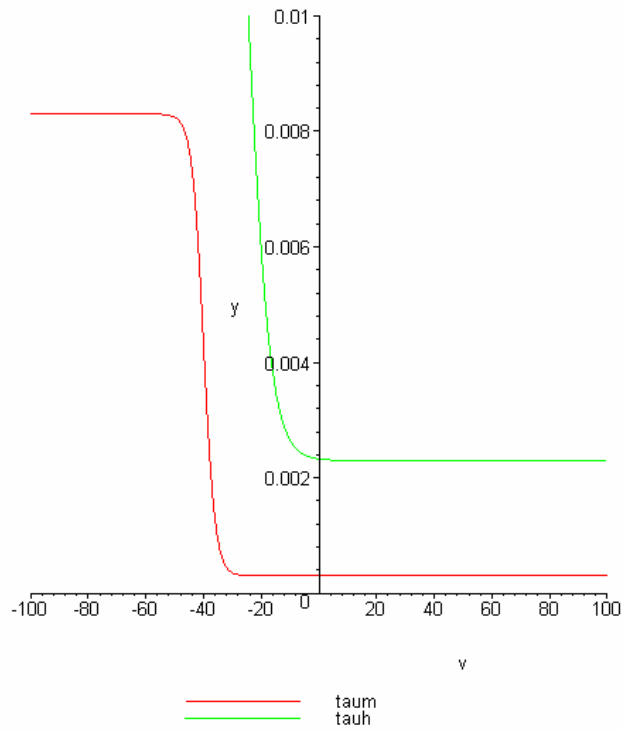

Equilibrium proportion for Sodium Current

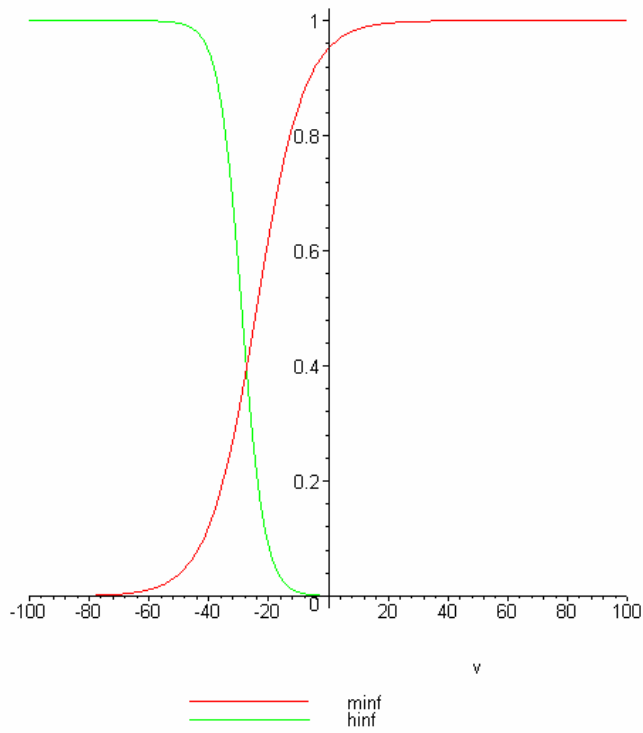

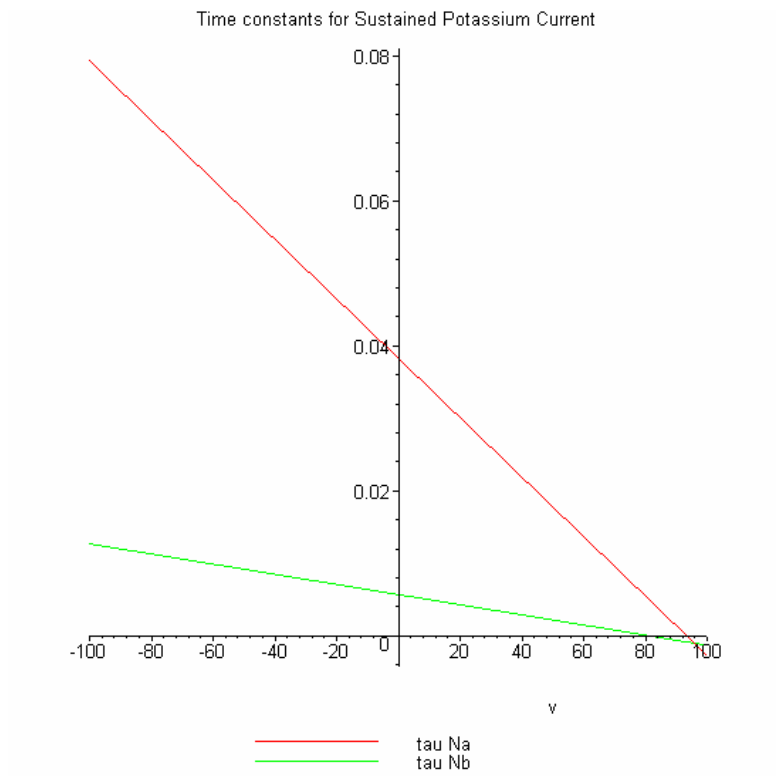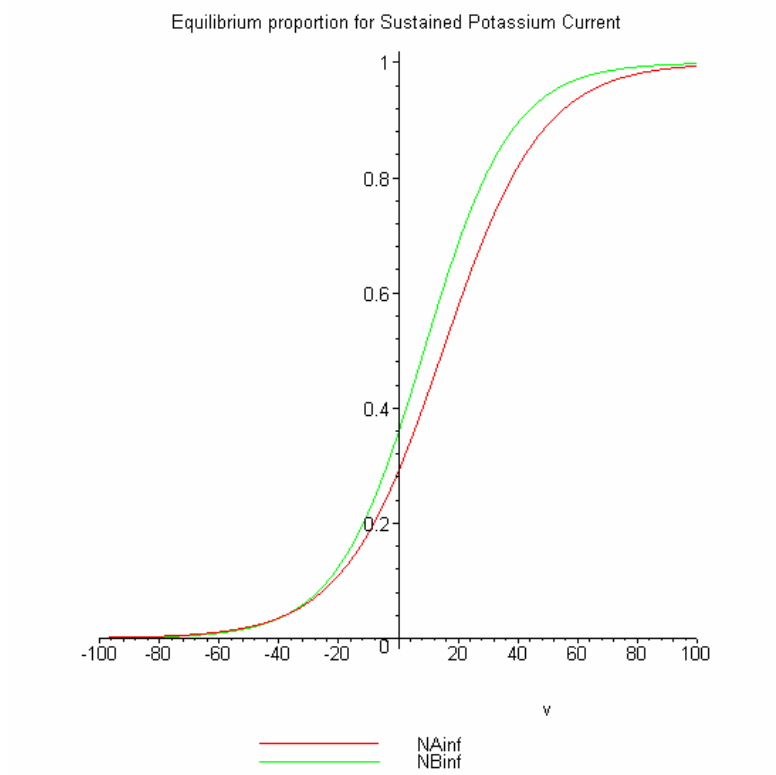

Time constants for Transient Potassium Current

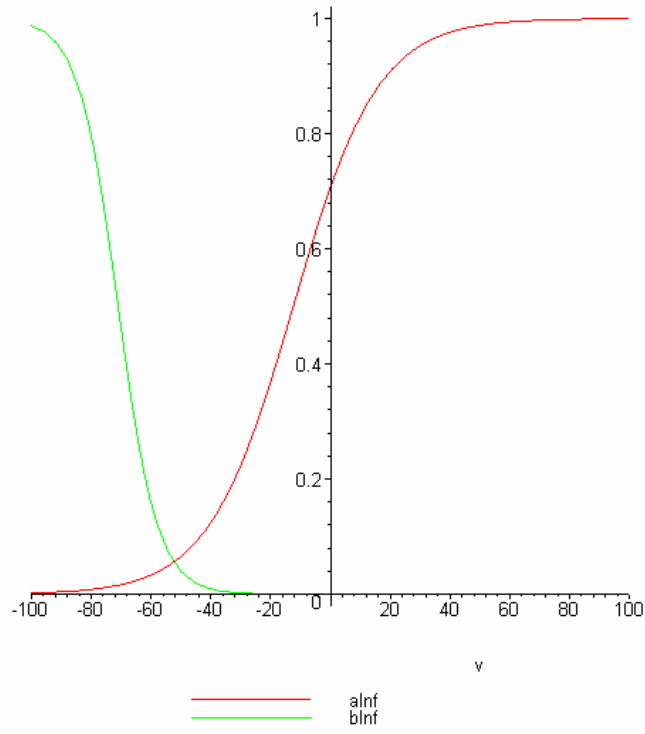

Equilibrium proportion for Transient Potassium Current

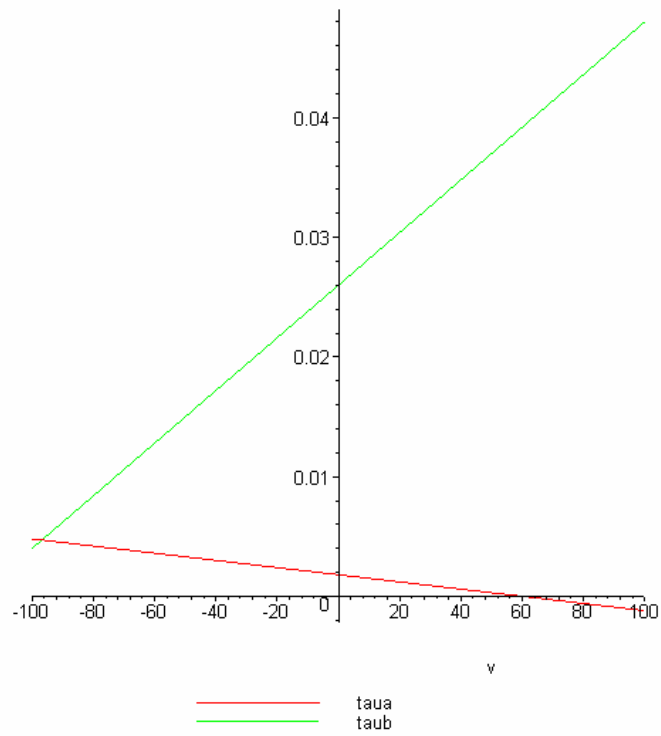

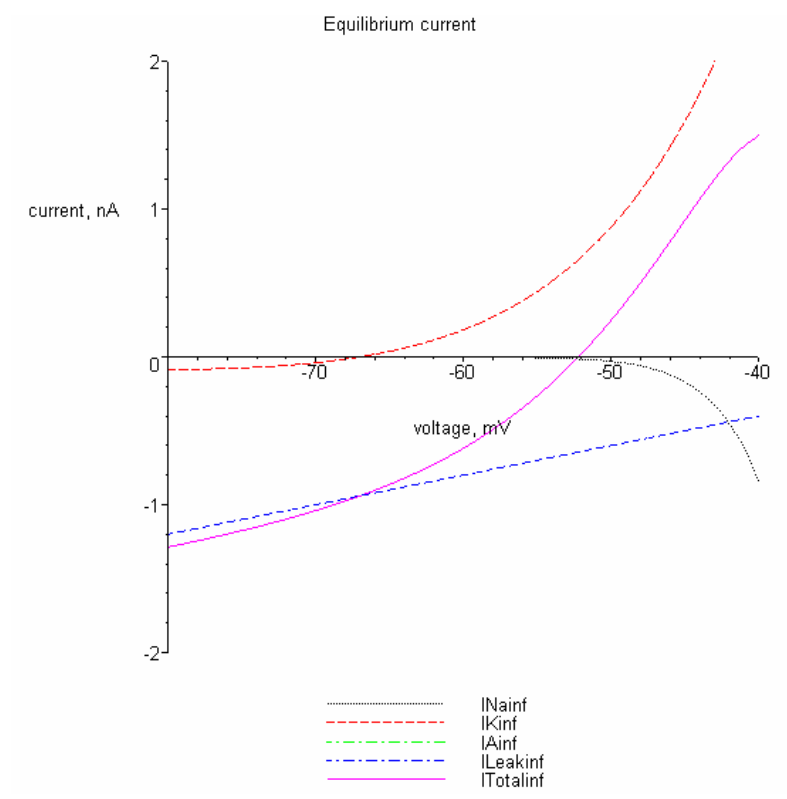

Supplement: 1471-2202-6-70-S3.pdf [file 1471-2202-6-70-S3.pdf]
